# Supplementary material for: The effect of indium substitution on the structure and NLO properties of Ba6Cs2Ga10Se20Cl4
Source: Royal Society of Chemistry journal article supplement (doi:10.1039/c6qi00104a), 2016-01-01
Supplement: c6qi00104a1.pdf [file c6qi00104a1.pdf]

## Supporting Information

# The effect of indium substitution on the structure and NLO property of $\text{Ba}_6\text{Cs}_2\text{Ga}_{10}\text{Se}_{20}\text{Cl}_4$

Yan-Yan Li<sup>a</sup>, Peng-Fei Liu,<sup>a</sup> Hua Lin,<sup>a</sup> Mei-Tian Wang<sup>b</sup> and Ling Chen<sup>\*a</sup>

<sup>a</sup>Key Laboratory of Optoelectronic Materials Chemistry and Physics, Fujian Institute of Research on the Structure of Matter, Chinese Academy of Sciences, Fuzhou, Fujian 350002, People's Republic of China

<sup>b</sup>Swiss Light Source, Paul Scherrer Institute, CH-5232 Villigen, Switzerland

To whom correspondence should be addressed. E-mail: [chenl@fjirsm.ac.cn](mailto:chenl@fjirsm.ac.cn)

Tel: (011) 86-591-63173131.

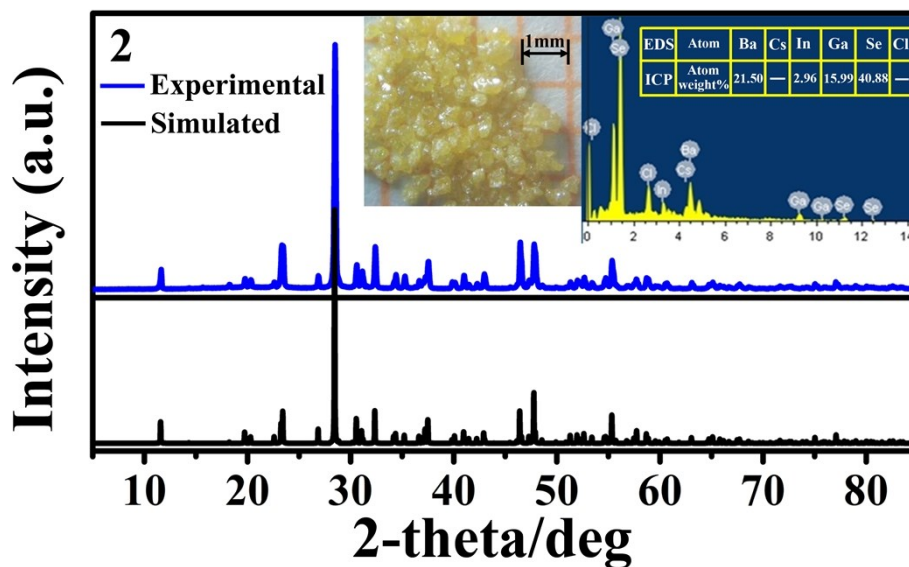

**Figure S1.** Experimental and calculated powder XRD of  $\text{Ba}_6\text{Cs}_2\text{InGa}_9\text{Se}_{20}\text{Cl}_4$ , **2** with inset of crystal photos, EDX and ICP results.

**Table S1.** The ICP data of  $\text{Ba}_6\text{Cs}_2\text{In}_2\text{Ga}_8\text{Se}_{20}\text{Cl}_4$ , **1** and  $\text{Ba}_6\text{Cs}_2\text{InGa}_9\text{Se}_{20}\text{Cl}_4$ , **2**.

| Comp.                                                                               | Element | Weight% | Formula                                                            |
|-------------------------------------------------------------------------------------|---------|---------|--------------------------------------------------------------------|
| <b>1</b><br>$\text{Ba}_6\text{Cs}_2\text{In}_2\text{Ga}_8\text{Se}_{20}\text{Cl}_4$ | Ba      | 20.42   | $\text{Ba}_{6.30}\text{In}_{2.0}\text{Ga}_{8.01}\text{Se}_{18.64}$ |
|                                                                                     | In      | 5.42    |                                                                    |
|                                                                                     | Ga      | 13.18   |                                                                    |
|                                                                                     | Se      | 34.73   |                                                                    |
| <b>2</b><br>$\text{Ba}_6\text{Cs}_2\text{InGa}_9\text{Se}_{20}\text{Cl}_4$          | Ba      | 21.50   | $\text{Ba}_{6.07}\text{In}_{1.0}\text{Ga}_{8.90}\text{Se}_{20.08}$ |
|                                                                                     | In      | 2.96    |                                                                    |
|                                                                                     | Ga      | 15.99   |                                                                    |
|                                                                                     | Se      | 40.88   |                                                                    |

**Table S2.** Crystallographic data and refinement details for Ba<sub>6</sub>Cs<sub>2</sub>In<sub>x</sub>Ga<sub>10-x</sub>Se<sub>20</sub>Cl<sub>4</sub> (x = 2, **1**; x = 1, **2**) from different batches.

| Comp.                                                                                    | <b>1</b>                                                                                                        |                                                                                                                 | <b>2</b>                                                                                                        |                                                                                                                 |
|------------------------------------------------------------------------------------------|-----------------------------------------------------------------------------------------------------------------|-----------------------------------------------------------------------------------------------------------------|-----------------------------------------------------------------------------------------------------------------|-----------------------------------------------------------------------------------------------------------------|
| Formula                                                                                  | Cry#1<br>Ba <sub>6</sub> Cs <sub>2</sub> In <sub>1.98</sub> Ga <sub>8.02</sub> Se <sub>20</sub> Cl <sub>4</sub> | Cry#2<br>Ba <sub>6</sub> Cs <sub>2</sub> In <sub>1.97</sub> Ga <sub>8.03</sub> Se <sub>20</sub> Cl <sub>4</sub> | Cry#1<br>Ba <sub>6</sub> Cs <sub>2</sub> In <sub>0.97</sub> Ga <sub>9.03</sub> Se <sub>20</sub> Cl <sub>4</sub> | Cry#2<br>Ba <sub>6</sub> Cs <sub>2</sub> In <sub>0.96</sub> Ga <sub>9.04</sub> Se <sub>20</sub> Cl <sub>4</sub> |
| fw                                                                                       | 1798.68                                                                                                         | 1798.45                                                                                                         | 1775.90                                                                                                         | 1775.68                                                                                                         |
| crystal system                                                                           | Tetragonal                                                                                                      |                                                                                                                 |                                                                                                                 |                                                                                                                 |
| crystal color                                                                            | light yellow                                                                                                    |                                                                                                                 |                                                                                                                 |                                                                                                                 |
| space                                                                                    | <i>I</i> -4 (no.82)                                                                                             |                                                                                                                 |                                                                                                                 |                                                                                                                 |
| <i>a</i> = <i>b</i> (Å)                                                                  | 8.7627(7)                                                                                                       | 8.7583(7)                                                                                                       | 8.7444(4)                                                                                                       | 8.7459(4)                                                                                                       |
| <i>c</i> (Å)                                                                             | 15.817(3)                                                                                                       | 15.808(3)                                                                                                       | 15.732(2)                                                                                                       | 15.734(2)                                                                                                       |
| <i>V</i> (Å <sup>3</sup> )                                                               | 1214.5(3)                                                                                                       | 1212.6(3)                                                                                                       | 1202.9(2)                                                                                                       | 1203.5(2)                                                                                                       |
| <i>Z</i>                                                                                 | 2                                                                                                               | 2                                                                                                               | 2                                                                                                               | 2                                                                                                               |
| <i>D<sub>c</sub></i> (g/cm <sup>3</sup> )                                                | 4.919                                                                                                           | 4.926                                                                                                           | 4.903                                                                                                           | 4.900                                                                                                           |
| <i>μ</i> (mm <sup>-1</sup> )                                                             | 26.748                                                                                                          | 26.791                                                                                                          | 27.086                                                                                                          | 27.074                                                                                                          |
| GOOF on <i>r</i> <sup>2</sup>                                                            | 1.044                                                                                                           | 1.036                                                                                                           | 1.213                                                                                                           | 1.148                                                                                                           |
| <i>R</i> <sub>1</sub> , <i>wR</i> <sub>2</sub> ( <i>I</i> > 2σ( <i>I</i> )) <sup>a</sup> | 0.0294, 0.0642                                                                                                  | 0.0289, 0.0741                                                                                                  | 0.0211, 0.0428                                                                                                  | 0.0180, 0.0350                                                                                                  |
| <i>R</i> <sub>1</sub> , <i>wR</i> <sub>2</sub> (all data)                                | 0.0323, 0.0649                                                                                                  | 0.0297, 0.0746                                                                                                  | 0.0294, 0.0819                                                                                                  | 0.0197, 0.0351                                                                                                  |
| largest diff. Peak and hole(e/Å <sup>3</sup> )                                           | 1.031, -0.909                                                                                                   | 1.115, -1.206                                                                                                   | 1.620, -2.225                                                                                                   | 0.563, -0.764                                                                                                   |
| Absolute structure parameter                                                             | 0.00(4)                                                                                                         | 0.00(3)                                                                                                         | 0.00(5)                                                                                                         | 0.00(2)                                                                                                         |

<sup>a</sup>*R*<sub>1</sub> = Σ||*F*<sub>o</sub>| - |*F*<sub>c</sub>||/Σ|*F*<sub>o</sub>|, *wR*<sub>2</sub> = [Σ*w*(*F*<sub>o</sub><sup>2</sup> - *F*<sub>c</sub><sup>2</sup>)/Σ*w*(*F*<sub>o</sub><sup>2</sup>)<sup>2</sup>]<sup>1/2</sup>

**Table S3.** Atomic coordinates and equivalent isotropic displacement parameters of **1**, Ba<sub>6</sub>Cs<sub>2</sub>In<sub>2</sub>Ga<sub>8</sub>Se<sub>20</sub>Cl<sub>4</sub>.

| 1, Ba <sub>6</sub> Cs <sub>2</sub> In <sub>2</sub> Ga <sub>8</sub> Se <sub>20</sub> Cl <sub>4</sub> |            |            |            |            |                                   |         |
|-----------------------------------------------------------------------------------------------------|------------|------------|------------|------------|-----------------------------------|---------|
| Atom                                                                                                | Wyck.      | <i>x</i>   | <i>y</i>   | <i>z</i>   | U <sub>eq</sub> (Å <sup>2</sup> ) | S.O.F   |
| Ba                                                                                                  | 8 <i>g</i> | 0.26097(6) | 0.37151(7) | 0.36409(3) | 0.0274(2)                         | 0.75    |
| Cs                                                                                                  | 8 <i>g</i> | 0.26097(6) | 0.37151(7) | 0.36409(3) | 0.0274(2)                         | 0.25    |
| In1                                                                                                 | 2 <i>d</i> | 0.0000     | 0.5000     | 0.7500     | 0.0153(5)                         | 0.52(2) |
| Ga1                                                                                                 | 2 <i>d</i> | 0.0000     | 0.5000     | 0.7500     | 0.0153(5)                         | 0.48(2) |
| In2                                                                                                 | 8 <i>g</i> | 0.40115(9) | 0.30879(9) | 0.08426(5) | 0.0143(3)                         | 0.12(2) |
| Ga2                                                                                                 | 8 <i>g</i> | 0.40115(9) | 0.30879(9) | 0.08426(5) | 0.0143(3)                         | 0.88(2) |
| Se1                                                                                                 | 8 <i>g</i> | 0.2822(2)  | 0.1243(2)  | 0.17561(5) | 0.0219(2)                         | 1       |
| Se2                                                                                                 | 8 <i>g</i> | 0.1867(2)  | 0.4139(2)  | 0.00726(6) | 0.0225(2)                         | 1       |
| Se3                                                                                                 | 4 <i>e</i> | 0.0000     | 0.0000     | 0.32179(9) | 0.0346(4)                         | 1       |
| Cl1                                                                                                 | 2 <i>c</i> | 0.0000     | 0.5000     | 0.2500     | 0.039(2)                          | 1       |
| Cl2                                                                                                 | 2 <i>a</i> | 0.0000     | 0.0000     | 0.0000     | 0.036(2)                          | 1       |

**Table S4.** Atomic coordinates and equivalent isotropic displacement parameters of **2**, Ba<sub>6</sub>Cs<sub>2</sub>InGa<sub>9</sub>Se<sub>20</sub>Cl<sub>4</sub>.

| 2, Ba <sub>6</sub> Cs <sub>2</sub> InGa <sub>9</sub> Se <sub>20</sub> Cl <sub>4</sub> |            |           |           |            |                                   |         |
|---------------------------------------------------------------------------------------|------------|-----------|-----------|------------|-----------------------------------|---------|
| Atom                                                                                  | Wyck.      | <i>x</i>  | <i>y</i>  | <i>z</i>   | U <sub>eq</sub> (Å <sup>2</sup> ) | S.O.F   |
| Ba                                                                                    | 8 <i>g</i> | 0.2612(2) | 0.3704(2) | 0.36381(6) | 0.0269(3)                         | 0.75    |
| Cs                                                                                    | 8 <i>g</i> | 0.2612(2) | 0.3704(2) | 0.36381(6) | 0.0269(3)                         | 0.25    |
| In1                                                                                   | 2 <i>d</i> | 0.0000    | 0.5000    | 0.7500     | 0.0136(8)                         | 0.28(2) |
| Ga1                                                                                   | 2 <i>d</i> | 0.0000    | 0.5000    | 0.7500     | 0.0136(8)                         | 0.72(2) |
| In2                                                                                   | 8 <i>g</i> | 0.4028(2) | 0.3090(2) | 0.08456(9) | 0.0132(5)                         | 0.05(2) |
| Ga2                                                                                   | 8 <i>g</i> | 0.4028(2) | 0.3090(2) | 0.08456(9) | 0.0132(5)                         | 0.95(2) |
| Se1                                                                                   | 8 <i>g</i> | 0.2862(2) | 0.1226(2) | 0.17593(9) | 0.0193(3)                         | 1       |
| Se2                                                                                   | 8 <i>g</i> | 0.1879(2) | 0.4138(2) | 0.0080(2)  | 0.0201(3)                         | 1       |
| Se3                                                                                   | 4 <i>e</i> | 0.0000    | 0.0000    | 0.3214(2)  | 0.0306(6)                         | 1       |
| Cl1                                                                                   | 2 <i>c</i> | 0.0000    | 0.5000    | 0.2500     | 0.041(2)                          | 1       |
| Cl2                                                                                   | 2 <i>a</i> | 0.0000    | 0.0000    | 0.0000     | 0.036(2)                          | 1       |

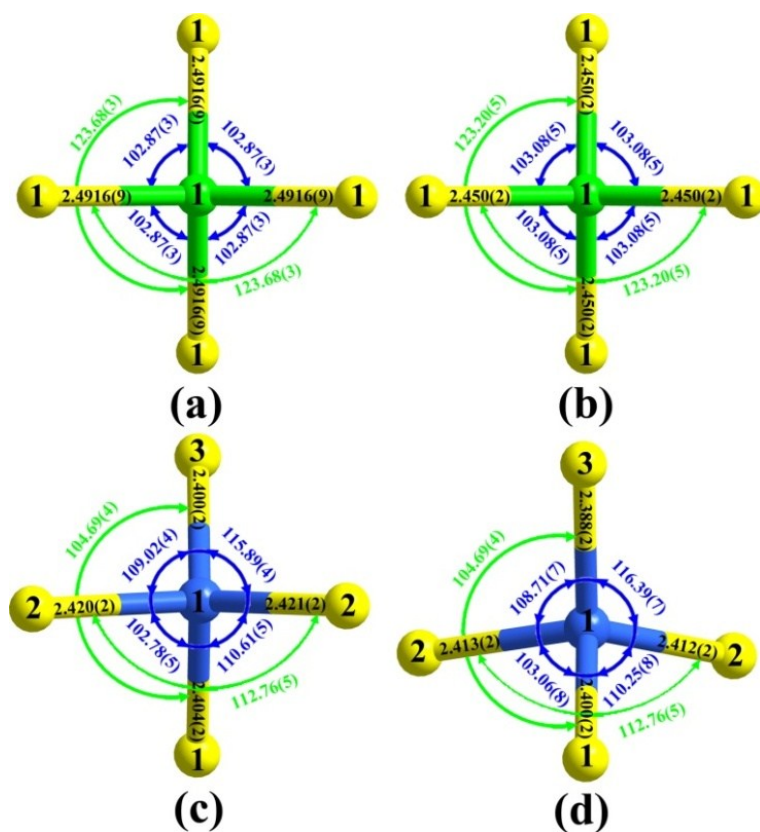

**Figure S2.** (a) and (b) The  $\text{In}_y\text{Ga}_{4-y}\text{Se}_4$  T1 tetrahedron of  $\text{Ba}_6\text{Cs}_2\text{In}_2\text{Ga}_8\text{Se}_{20}\text{Cl}_4$ , **1** and  $\text{Ba}_6\text{Cs}_2\text{InGa}_9\text{Se}_{20}\text{Cl}_4$ , **2** with In/Ga–Se bond length (Å) and Se–In/Ga–Se angle (°) marked. (c) and (d) The  $\text{In}_z\text{Ga}_{(1-z)}\text{Se}_4$  tetrahedron in T2 with In/Ga–Se bond length (Å) and Se– In/Ga–Se angle (°) marked.

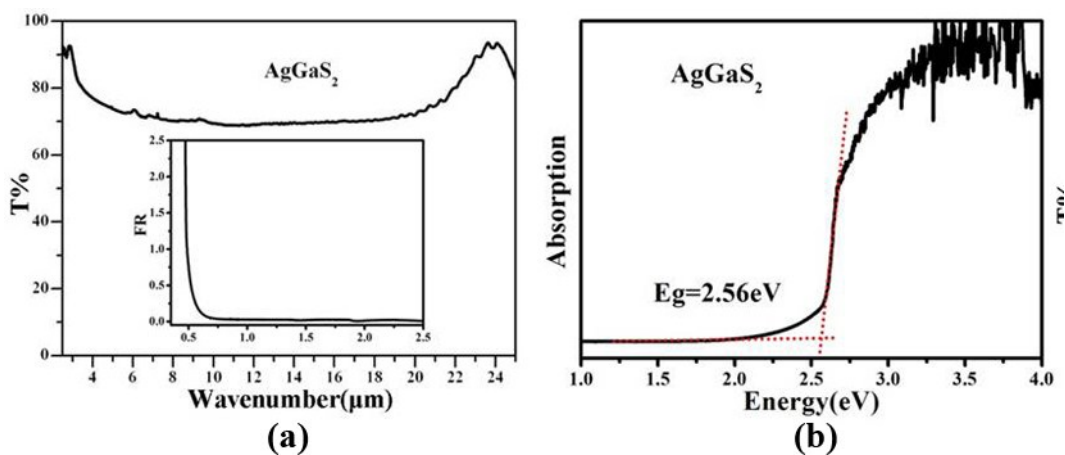

**Figure S3.** (a) Reflection spectra (inset) and FT-IR spectra, (b) Diffuse reflection spectra of  $\text{AgGaS}_2$ .

**Table S5.** Selected bond lengths (Å) of  $\text{Ba}_6\text{Cs}_2\text{In}_2\text{Ga}_8\text{Se}_{20}\text{Cl}_4$ , **1** and  $\text{Ba}_6\text{Cs}_2\text{InGa}_9\text{Se}_{20}\text{Cl}_4$ , **2**.

| $\text{Ba}_6\text{Cs}_2\text{In}_2\text{Ga}_8\text{Se}_{20}\text{Cl}_4$ , <b>1</b> |           | $\text{Ba}_6\text{Cs}_2\text{InGa}_9\text{Se}_{20}\text{Cl}_4$ , <b>2</b> |           |
|------------------------------------------------------------------------------------|-----------|---------------------------------------------------------------------------|-----------|
| Ba/Cs–Cl1                                                                          | 3.1214(6) | Ba/Cs–Cl1                                                                 | 3.1156(9) |
| Ba/Cs–Cl2                                                                          | 3.2039(6) | Ba/Cs–Cl2                                                                 | 3.199(2)  |
| Ba/Cs–Se2                                                                          | 3.403(2)  | Ba/Cs–Se2                                                                 | 3.394(2)  |
| Ba/Cs–Se1                                                                          | 3.512(2)  | Ba/Cs–Se1                                                                 | 3.500(2)  |
| Ba/Cs–Se1                                                                          | 3.687(2)  | Ba/Cs–Se1                                                                 | 3.672(2)  |
| Ba/Cs–Se2                                                                          | 3.693(2)  | Ba/Cs–Se2                                                                 | 3.682(2)  |
| Ba/Cs–Se2                                                                          | 3.755(2)  | Ba/Cs–Se2                                                                 | 3.757(2)  |
| Ba/Cs–Se3                                                                          | 3.779(2)  | Ba/Cs–Se3                                                                 | 3.760(2)  |
| Ba/Cs–Se1                                                                          | 3.787(2)  | Ba/Cs–Se1                                                                 | 3.827(2)  |
| In1/Ga1–Se1×4                                                                      | 2.4916(9) | In1/Ga1–Se1×4                                                             | 2.450(2)  |
| In2/Ga2–Se3                                                                        | 2.400(2)  | In2/Ga2–Se3                                                               | 2.388(2)  |
| In2/Ga2–Se1                                                                        | 2.404(2)  | In2/Ga2–Se1                                                               | 2.400(2)  |
| In2/Ga2–Se2                                                                        | 2.420(2)  | In2/Ga2–Se2                                                               | 2.412(2)  |
| In2/Ga2–Se2                                                                        | 2.421(2)  | In2/Ga2–Se2                                                               | 2.413(2)  |

**Table S6.** The calculated total energies of ideal single T1 or T2 substitution models of  $\text{Ba}_6\text{Cs}_2\text{In}_2\text{Ga}_8\text{Se}_{20}\text{Cl}_4$ , **1** (Model-1 (T1), Model-2 (T2)) and  $\text{Ba}_6\text{Cs}_2\text{InGa}_9\text{Se}_{20}\text{Cl}_4$ , **2** (Model-3 (T1), Model-4 (T2)).

| Comp.                                                                              | Model | Substitution occurs at | Total energy (eV) |
|------------------------------------------------------------------------------------|-------|------------------------|-------------------|
| $\text{Ba}_6\text{Cs}_2\text{In}_2\text{Ga}_8\text{Se}_{20}\text{Cl}_4$ , <b>1</b> | 1     | T1 site                | -195.39           |
|                                                                                    | 2     | T2 site                | -195.04           |
| $\text{Ba}_6\text{Cs}_2\text{InGa}_9\text{Se}_{20}\text{Cl}_4$ , <b>2</b>          | 3     | T1 site                | -195.97           |
|                                                                                    | 4     | T2 site                | -195.81           |

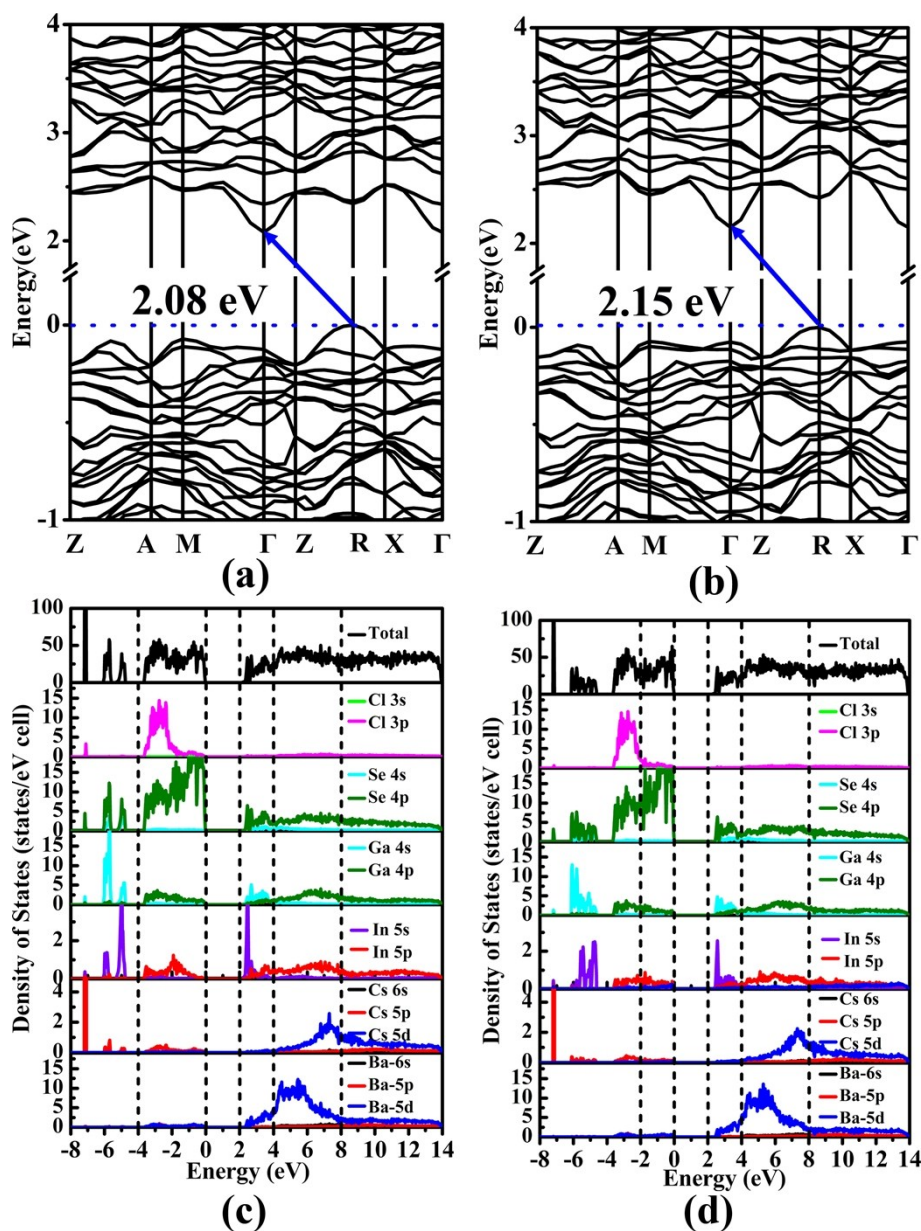

**Figure S4.** Band structures of  $\text{Ba}_6\text{Cs}_2\text{In}_2\text{Ga}_8\text{Se}_{20}\text{Cl}_4$ , **1** (a) Model 1 (T1) and (b) Model 2 (T2), total and partial densities of states of  $\text{Ba}_6\text{Cs}_2\text{In}_2\text{Ga}_8\text{Se}_{20}\text{Cl}_4$ , **1** (c) Model 1 (T1) and (d) Model 2 (T2).

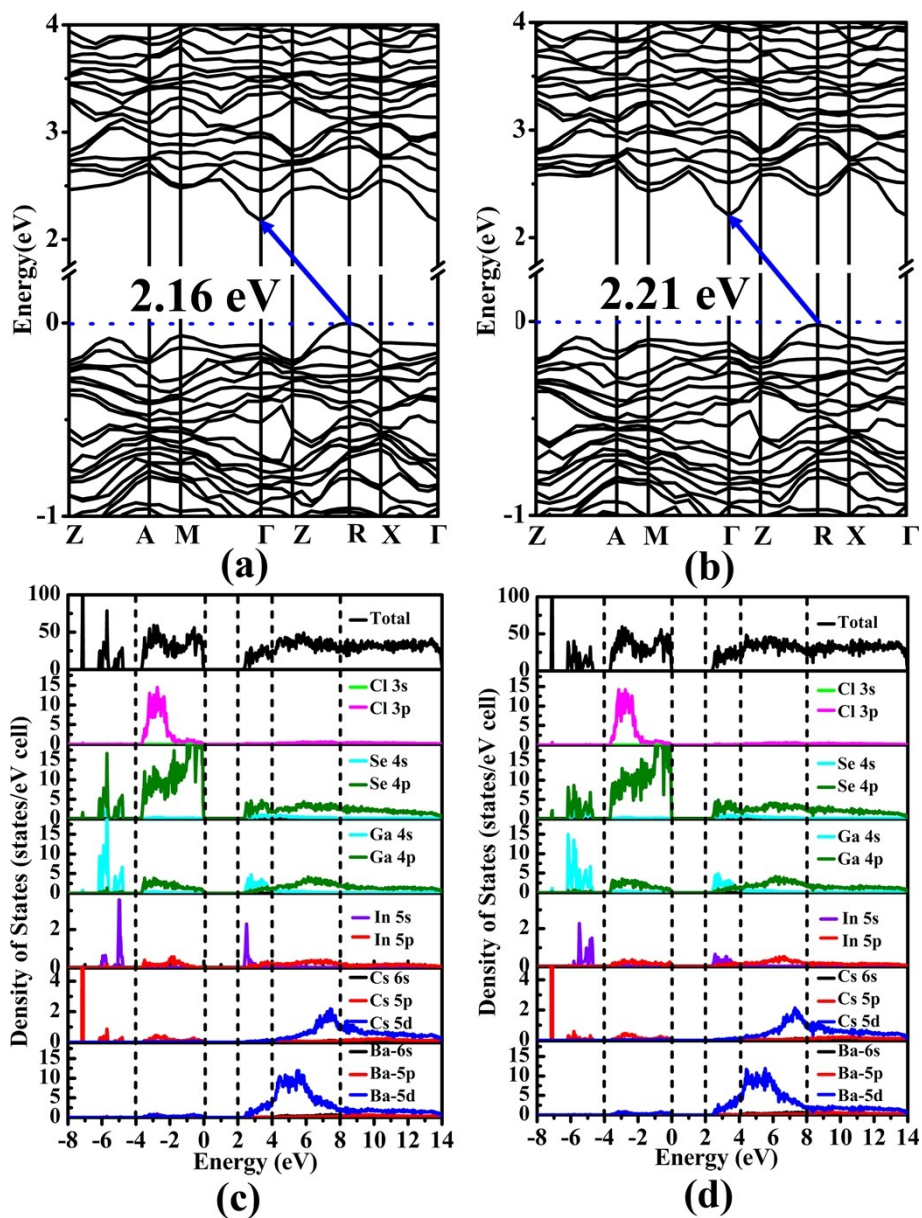

**Figure S5.** Band structures of  $\text{Ba}_6\text{Cs}_2\text{InGa}_9\text{Se}_{20}\text{Cl}_4$ , **2** (a) Model 3 (T1) and (b) Model 4 (T2), total and partial densities of states of  $\text{Ba}_6\text{Cs}_2\text{InGa}_9\text{Se}_{20}\text{Cl}_4$ , **2** (c) Model 3 (T1) and (d) Model 4 (T2).



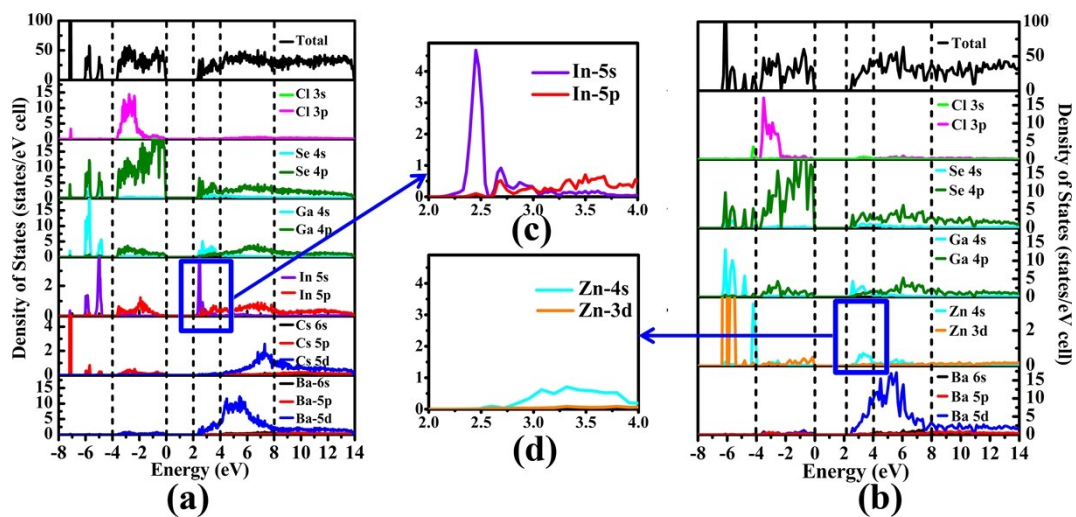

**Figure S6.** (a) Total and partial densities of states of Ba<sub>6</sub>Cs<sub>2</sub>In<sub>2</sub>Ga<sub>8</sub>Se<sub>20</sub>Cl<sub>4</sub> (Model 1 (T1)), (b) Total and partial densities of states of Ba<sub>8</sub>Zn<sub>2</sub>Ga<sub>8</sub>Se<sub>20</sub>Cl<sub>4</sub>, (c) Partial densities of states of In atom of Ba<sub>6</sub>Cs<sub>2</sub>In<sub>2</sub>Ga<sub>8</sub>Se<sub>20</sub>Cl<sub>4</sub> (Model 1 (T1)) and (d) Partial densities of states of Zn atom of Ba<sub>8</sub>Zn<sub>2</sub>Ga<sub>8</sub>Se<sub>20</sub>Cl<sub>4</sub>.
